# Supplementary material for: Interaction between step-to-step variability and metabolic cost of transport during human walking
Source: Oxford University Press journal article supplement (doi:10.1242/jeb.181834), 2018-01-01
Supplement: jeb181834supp.pdf [file jeb181834supp.pdf]

## Supplementary Information

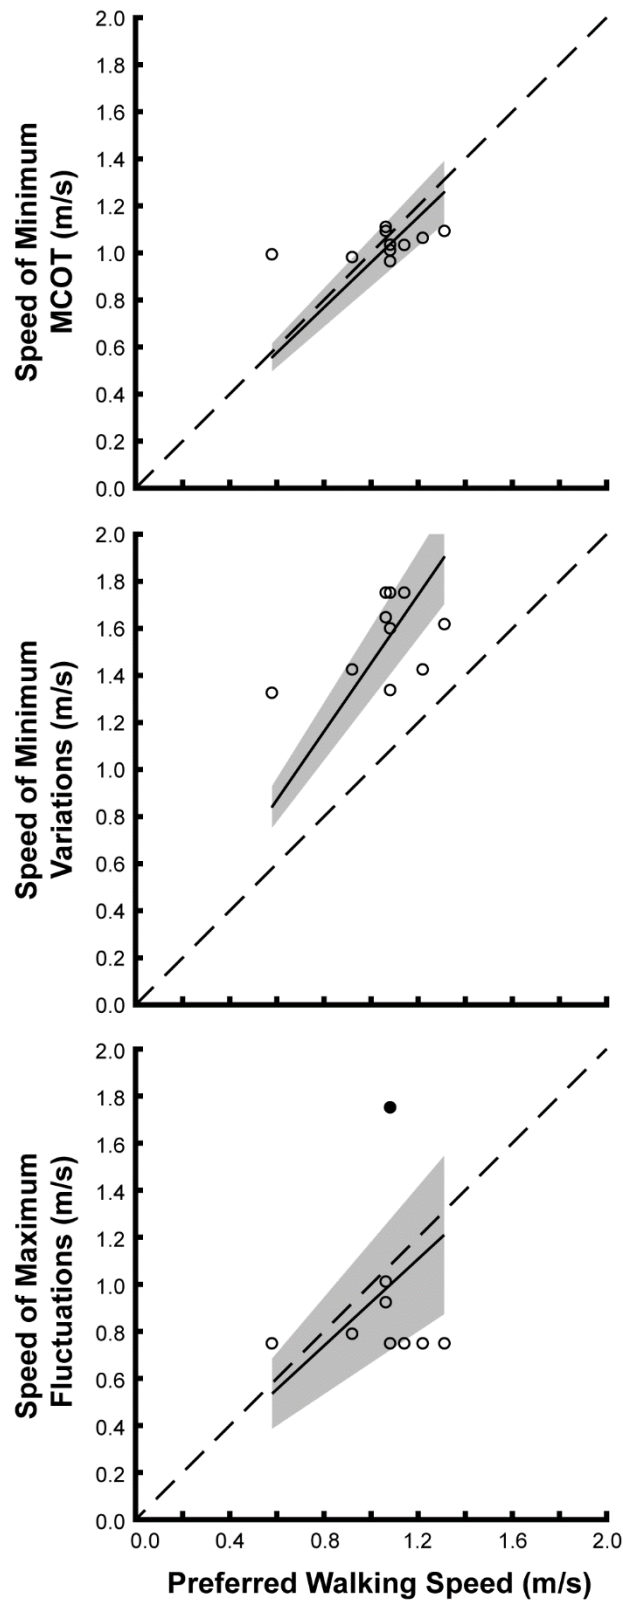

**Figure S1. No-intercept regressions showing the relationships between the preferred walking speed and minimum of net metabolic cost of transport (MCOT) and Variations (step length CV) and the maximum of Fluctuations (DFA- $\alpha$ ).** A slope of 1 (dashed line for reference) would indicate that the variable is perfectly capable of predicting preferred walking speed. The slopes from MCT ( $p = 0.447$ ) and Fluctuations ( $p = 0.564$ ) were not significantly different from one, but the slope from Variations was significantly different than one ( $p < 0.001$ ). Shaded areas indicate 95% confidence intervals around each regression line. Each circle represents a single subject. Filled circle denotes two data points at same position. CV = Coefficient of Variation; DFA = Detrended Fluctuation Analysis

Table S1. **Step parameters for each condition, reported as mean (s.d.).**

| Speed (m s <sup>-1</sup> ) | 0.75       | 1.00       | 1.25       | 1.50       | 1.75       |
|----------------------------|------------|------------|------------|------------|------------|
| Step Width (cm)            | 9.0(3.6)   | 9.2(3.2)   | 9.5(3.1)   | 10.4(2.8)  | 11.1(3.1)  |
| Step Length (m)            | 0.50(0.04) | 0.59(0.05) | 0.67(0.05) | 0.74(0.05) | 0.80(0.06) |
| Right only (m)             | 0.51(0.04) | 0.59(0.05) | 0.68(0.05) | 0.75(0.05) | 0.81(0.06) |
| Left only (m)              | 0.50(0.03) | 0.59(0.05) | 0.67(0.05) | 0.74(0.05) | 0.79(0.05) |
| Step time (s)              | 0.68(0.05) | 0.60(0.05) | 0.55(0.04) | 0.51(0.04) | 0.47(0.03) |
| Stance time (s)            | 0.92(0.07) | 0.79(0.07) | 0.71(0.06) | 0.65(0.05) | 0.60(0.04) |

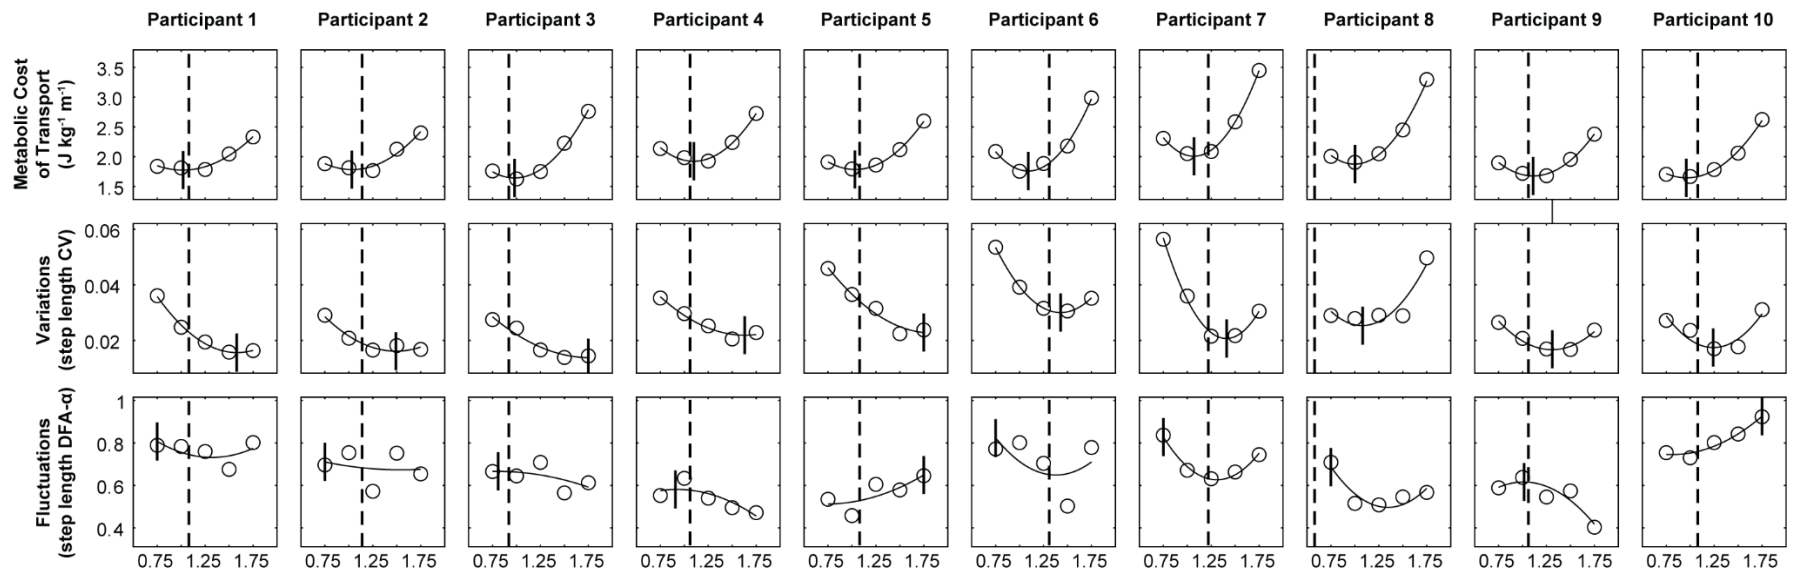

**Figure S2. Subject-specific data across speeds.** Row 1: Net metabolic cost of transport; solid vertical line denotes estimated minimum. Row 2: Variations (step length CV). Solid vertical line denotes estimated minimum Row 3: Fluctuations (step length DFA- $\alpha$ ). Solid vertical line denotes estimated maximum. Dashed vertical line denotes preferred walking speed. CV = Coefficient of Variation; DFA = Detrended Fluctuation Analysis
